# Supplementary material for: Brief Report: Does Most Mortality in Patients on ART Occur in Care or After Lost to Follow-Up? Evidence From the Themba Lethu Clinic, South Africa
Source: PubMed Central journal article supplement — J Acquir Immune Defic Syndr. 2015 Oct 15;70(3):323–8. doi: 10.1097/QAI.0000000000000755 (PMC4627171; doi:10.1097/qai.0000000000000755), 2015-10-15
Supplement: qai-70-323-s001.pdf [file qai-70-323-s001.pdf]

# Supplementary Appendix

Figure S1. Method for estimation of person-time in care and lost to follow-up (LTF).

**Example I.** Patient is not lost from care.

Exposure status = unexposed (in care); Person time = time in care ( $y_1$ );

Outcome = died or censored (i.e. transfer out or dataset closure)

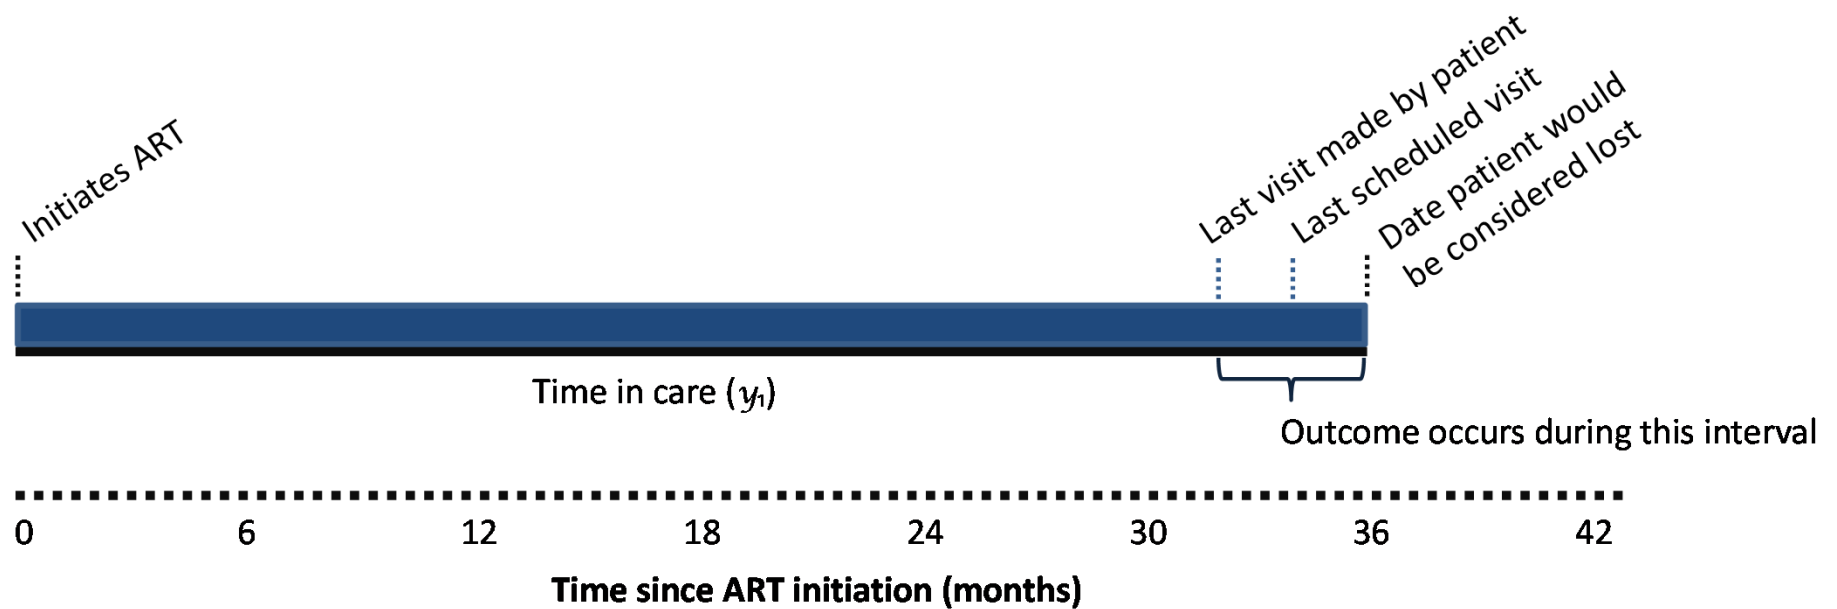

## Supplementary Appendix

**Example II.** Patient is lost from care. Separate records are created for person-time in care and lost.

First record: Exposure status = unexposed (in care); Person time = time in care ( $y_1$ );  
Outcome = alive

Second record: Exposure status = exposed (lost); Person time = time lost ( $x_1$ );  
Outcome = died or censored by dataset closure

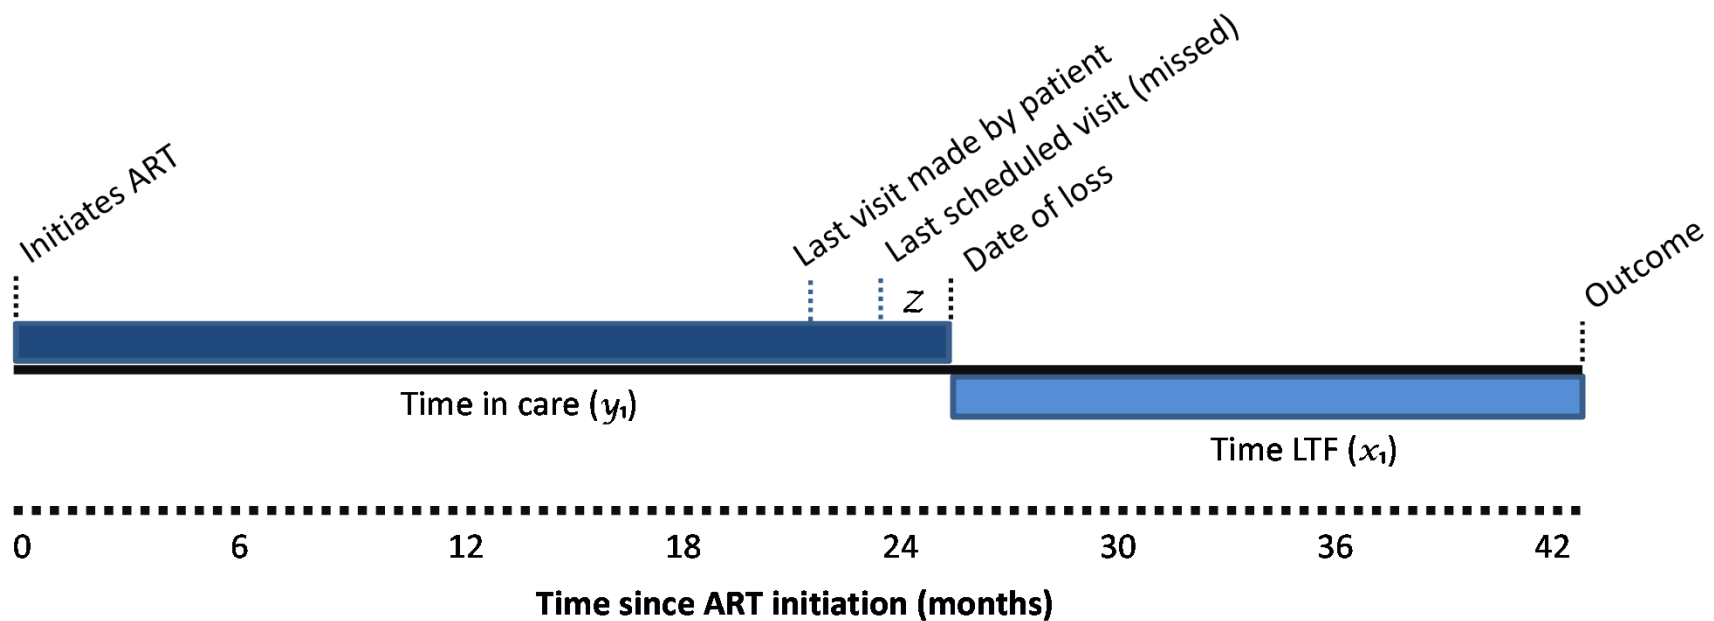

Note: The definition of lost will change duration of time Z. Person-time lost ( $x_1$ ) accrues from date of loss.

# Supplementary Appendix

**Example III.** Patient is temporarily lost but returns to care. Separate records are created for person-time in care and lost.

First record: Exposure status = unexposed (in care); Person time = cumulative time in care ( $y_1 + y_2$ ); Outcome = died or censored by transfer out or dataset closure  
Second record: Exposure status = exposed (lost); Person time = time lost before returning to care ( $x_1$ ); Outcome = alive

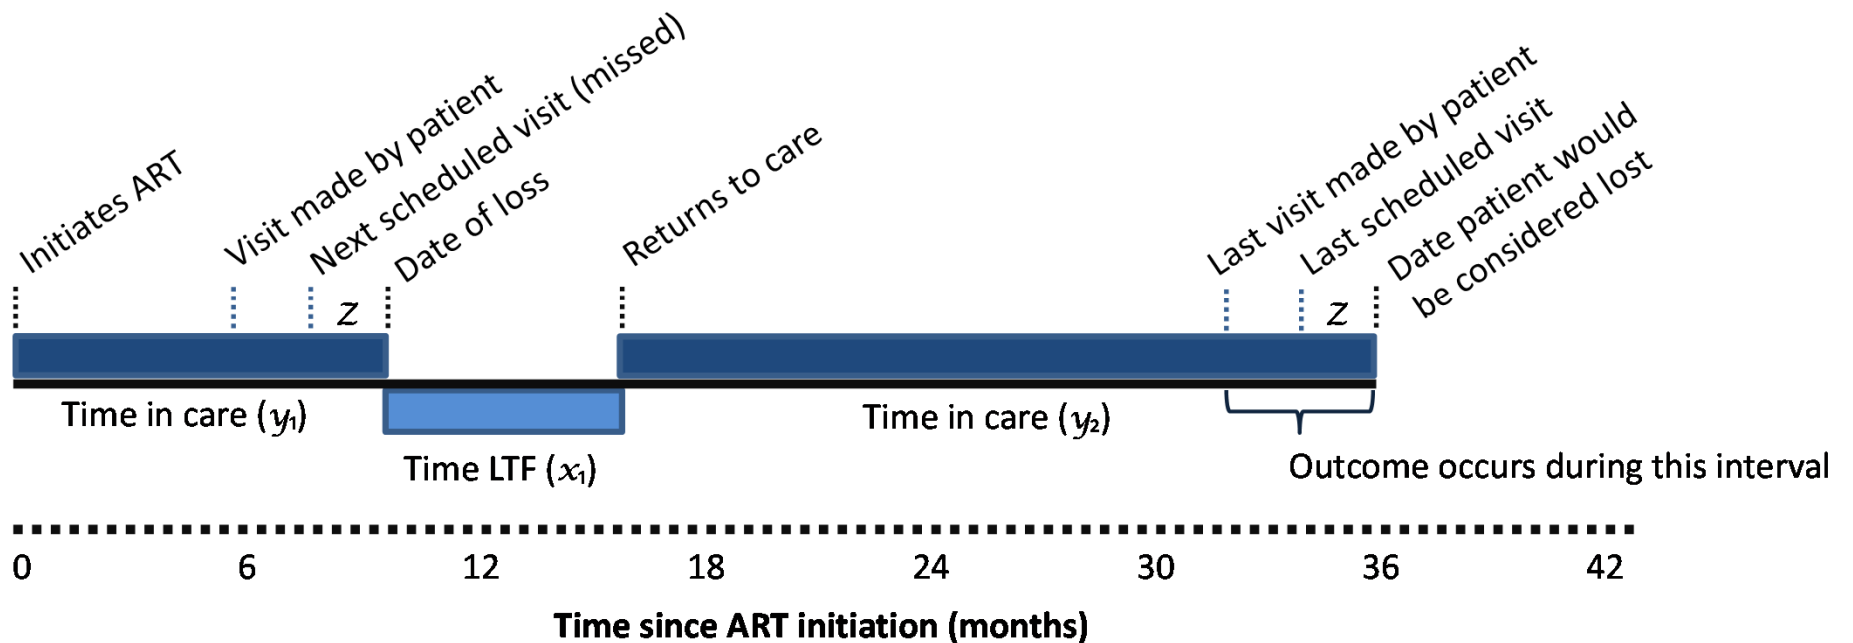

## Supplementary Appendix

**Example IV.** Patient is temporarily lost, returns to care, and is lost again. Separate records are created for person-time in care and lost.

First record: Exposure status = unexposed (in care); Person time = cumulative time in care ( $y_1 + y_2$ ); Outcome = alive

Second record: Exposure status = exposed (lost); Person time = cumulative time lost ( $x_1 + x_2$ ); Outcome = died or censored by dataset closure

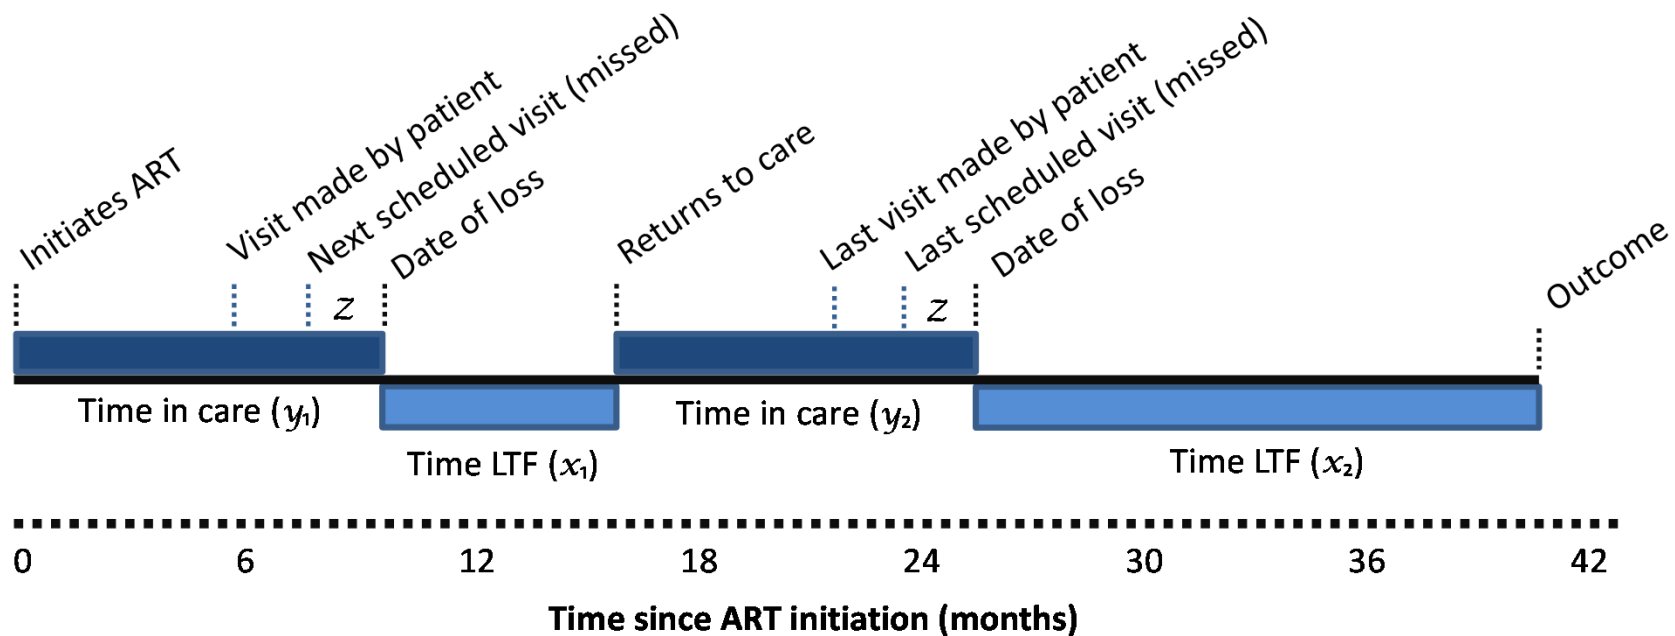

## Supplementary Appendix

Table S1. Mortality rates in care and lost to follow-up (LTF) stratified by year since ART initiation at the Themba Lethu HIV clinic in Johannesburg, South Africa.

| Definition of LTF (late for scheduled visit) | Exposure group | 1st year after ART initiation (months 1-12) <sup>1</sup> |                                         | 2nd year after ART initiation (months 13-24) <sup>2</sup> |                                         | First 2 years after ART initiation (months 1-24) <sup>3</sup> |                                         |
|----------------------------------------------|----------------|----------------------------------------------------------|-----------------------------------------|-----------------------------------------------------------|-----------------------------------------|---------------------------------------------------------------|-----------------------------------------|
|                                              |                | MR/1,000 py (95% CI)                                     | MR difference: deaths/1,000 py (95% CI) | MR/1,000 py (95% CI)                                      | MR difference: deaths/1,000 py (95% CI) | MR/1,000 py (95% CI)                                          | MR difference: deaths/1,000 py (95% CI) |
| ≥1 Day                                       | In Care        | 67.0 (61.9-72.4)                                         | REF                                     | 11.4 (9.2-14.2)                                           | REF                                     | 40.8 (37.7-44.2)                                              | REF                                     |
|                                              | LTF            | 321.9 (291.5-355.6)                                      | 255.0 (222.5-287.4)                     | 133.4 (115.3-154.3)                                       | 122.0 (102.4-141.6)                     | 226.4 (207.9-246.5)                                           | 185.6 (166.0-205.1)                     |
| ≥1 Month                                     | In Care        | 83.0 (77.5-88.9)                                         | REF                                     | 16.0 (13.3-19.1)                                          | REF                                     | 52.1 (48.7-55.8)                                              | REF                                     |
|                                              | LTF            | 279.0 (242.8-320.7)                                      | 196.0 (156.7-235.3)                     | 134.2 (114.1-158.0)                                       | 118.3 (96.2-140.3)                      | 197.6 (177.2-220.4)                                           | 145.5 (123.6-167.4)                     |
| ≥2 Months                                    | In Care        | 89.4 (83.7-95.5)                                         | REF                                     | 18.8 (15.9-22.2)                                          | REF                                     | 57.0 (53.4-60.8)                                              | REF                                     |
|                                              | LTF            | 224.4 (187.5-268.6)                                      | 135.0 (94.3-175.8)                      | 126.4 (105.9-151.0)                                       | 107.6 (85.0-130.3)                      | 167.8 (147.5-190.9)                                           | 110.8 (88.9-132.8)                      |
| ≥3 Months                                    | In Care        | 91.9 (86.2-98.0)                                         | REF                                     | 20.1 (17.1-23.6)                                          | REF                                     | 58.9 (55.3-62.8)                                              | REF                                     |
|                                              | LTF            | 200.7 (162.0-248.5)                                      | 108.8 (65.5-152.1)                      | 124.3 (103.2-149.7)                                       | 104.1 (80.8-127.5)                      | 157.1 (136.3-181.0)                                           | 98.1 (75.5-120.7)                       |
| ≥4 Months                                    | In Care        | 93.1 (87.4-99.3)                                         | REF                                     | 20.5 (17.5-24.0)                                          | REF                                     | 60.0 (56.3-63.9)                                              | REF                                     |
|                                              | LTF            | 191.2 (149.4-244.8)                                      | 98.1 (50.5-145.7)                       | 128.3 (106.2-155.1)                                       | 107.9 (83.3-132.4)                      | 152.8 (131.3-178.0)                                           | 92.9 (69.3-116.4)                       |
| ≥5 Months                                    | In Care        | 94.2 (88.4-100.3)                                        | REF                                     | 21.3 (18.2-24.8)                                          | REF                                     | 61.0 (57.4-64.9)                                              | REF                                     |
|                                              | LTF            | 177.2 (132.3-237.3)                                      | 83.0 (30.9-135.1)                       | 128.8 (105.8-156.6)                                       | 107.5 (82.1-133.0)                      | 146.2 (124.0-172.3)                                           | 85.1 (60.8-109.5)                       |
| ≥6 Months                                    | In Care        | 94.9 (89.2-101.1)                                        | REF                                     | 21.6 (18.6-25.2)                                          | REF                                     | 61.6 (57.9-65.5)                                              | REF                                     |
|                                              | LTF            | 164.0 (115.3-233.2)                                      | 69.0 (11.0-127.1)                       | 133.0 (108.9-162.5)                                       | 111.4 (84.6-138.2)                      | 145.3 (122.0-173.1)                                           | 83.7 (58.1-109.4)                       |
| <b>Total</b>                                 |                | <b>96.2 (90.5-102.4)</b>                                 | <b>N/A</b>                              | <b>31.2 (27.6-35.2)</b>                                   | <b>N/A</b>                              | <b>65.8 (62.1-69.7)</b>                                       | <b>N/A</b>                              |

<sup>1</sup> Excluded patients who initiated ART within 12 months of close of dataset (n=11,462 patients; n=1,013 deaths).

<sup>2</sup> Excluded patients who initiated ART within 24 months of close of dataset and who died or transferred out during the first year after ART initiation (n= 8,578 patients; n=261 deaths).

<sup>3</sup> Excluded patients who initiated ART within 24 months of close of dataset (n=9,781 patients; n=1,141 deaths).

Table S2. Predictors of mortality stratified by time in care and lost to follow-up ( $\geq 3$  months late for a scheduled visit) at the Themba Lethu HIV clinic in Johannesburg, South Africa.

| Exposure                                               | Exposure Category   | Reference group | Person-time in Care |                     |      | Person-time Lost to Follow-up |                     |      |
|--------------------------------------------------------|---------------------|-----------------|---------------------|---------------------|------|-------------------------------|---------------------|------|
|                                                        |                     |                 | aHR                 | 95% Hazard Ratio CI |      | aHR                           | 95% Hazard Ratio CI |      |
| Sex                                                    | Male                | Female          | 1.40                | 1.23                | 1.61 | 1.02                          | 0.81                | 1.28 |
| Age at ART Initiation (years)                          | 30-39               | 18-29           | 1.21                | 1.00                | 1.48 | 0.89                          | 0.67                | 1.17 |
|                                                        | 40-49               | 18-29           | 1.54                | 1.25                | 1.90 | 1.29                          | 0.95                | 1.74 |
|                                                        | 50+                 | 18-29           | 2.07                | 1.63                | 2.62 | 1.42                          | 0.95                | 2.13 |
| ART guideline initiated on                             | 2004 Guidelines     | 2010 Guidelines | 1.10                | 0.82                | 1.48 | 0.96                          | 0.49                | 1.86 |
| CD4 at ART Initiation (cells/mm <sup>3</sup> )         | 0-50                | >200            | 2.28                | 1.75                | 2.97 | 2.73                          | 1.61                | 4.61 |
|                                                        | 51-100              | >200            | 1.72                | 1.30                | 2.27 | 2.46                          | 1.44                | 4.21 |
|                                                        | 101-200             | >200            | 1.30                | 0.99                | 1.70 | 1.71                          | 1.01                | 2.89 |
| Tuberculosis at ART Initiation                         | Yes                 | No              | 0.93                | 0.79                | 1.10 | 1.02                          | 0.78                | 1.33 |
| Drugs in first-line ART Regimen                        | AZT + 3TC + EFV     | d4T + 3TC + EFV | 1.10                | 0.70                | 1.72 | 0.92                          | 0.43                | 1.96 |
|                                                        | TDF + 3TC/EMT + EFV | d4T + 3TC + EFV | 1.01                | 0.74                | 1.37 | 0.70                          | 0.34                | 1.44 |
|                                                        | Other               | d4T + 3TC + EFV | 0.88                | 0.68                | 1.15 | 0.41                          | 0.24                | 0.71 |
| Body mass index (kg/m <sup>2</sup> ) at ART Initiation | <18.5               | 18.5-24.9       | 1.62                | 1.41                | 1.87 | 1.12                          | 0.87                | 1.43 |
|                                                        | 25 and up           | 18.5-24.9       | 1.01                | 0.85                | 1.21 | 0.83                          | 0.61                | 1.13 |
| Haemoglobin at ART Initiation                          | Mild Anaemia        | Non-Anaemia     | 1.48                | 1.18                | 1.86 | 1.34                          | 0.97                | 1.85 |
|                                                        | Moderate Anaemia    | Non-Anaemia     | 2.40                | 1.95                | 2.96 | 1.42                          | 1.06                | 1.91 |
|                                                        | Severe Anaemia      | Non-Anaemia     | 3.62                | 2.83                | 4.63 | 1.32                          | 0.87                | 2.02 |
